# Supplementary material for: An evolutionarily conserved stop codon enrichment at the 5′ ends of mammalian piRNAs
Source: PubMed Central journal article supplement (PMC9018710; doi:10.1038/s41467-022-29787-3), 2022-04-19
Supplement: 41467_2022_29787_MOESM2_ESM.pdf [file 41467_2022_29787_MOESM2_ESM.pdf]

## **Description of Additional Supplementary Files**

File Name: Supplementary Data 1

Description: List of testis and ovary libraries per species in the piRNA cluster database.
